# Supplementary material for: Adolescent internet use: an exploratory analysis of adolescent and parent behaviours and attitudes in relation to the internet
Source: MDPI journal article supplement (doi:10.3390/diagnostics13030473), 2013-01-01
Supplement: s1 [file s1]

## Supplementary Tables

**Table S1 Comparison between study cohort and missing group**

|                               | <b>Total patients<br/>(<i>n</i>=606 )</b> | <b><i>n</i></b> | <b>Missing group<br/>(<i>n</i>=525)</b> | <b><i>n</i></b> | <b><i>p</i> Value</b> |
|-------------------------------|-------------------------------------------|-----------------|-----------------------------------------|-----------------|-----------------------|
| Age, year                     | 67.0 (10.9)                               | 606             | 64.9 (13.3)                             | 525             | 0.004                 |
| Male gender, n (%)            | 290 (47.9%)                               | 606             | 233 (44.4%)                             | 525             | 0.243                 |
| Body weight, kg               | 64.3 (12.0)                               | 591             | 63.9 (13.1)                             | 513             | 0.584                 |
| BMI, kg/m <sup>2</sup>        | 25.4 (3.9)                                | 591             | 25.2 (4.1)                              | 513             | 0.521                 |
| Current smoking, n (%)        | 102 (16.8%)                               | 606             | 117 (22.3%)                             | 525             | 0.021                 |
| Diabetes Mellitus, n (%)      | 185 (30.5%)                               | 606             | 99 (18.9%)                              | 525             | < 0.001               |
| Hypertension, n (%)           | 320 (52.8%)                               | 606             | 204 (38.9%)                             | 525             | < 0.001               |
| Dyslipidemia, n (%)           | 133 (21.9%)                               | 606             | 65 (12.4%)                              | 525             | < 0.001               |
| HBsAg positive, n (%)         | 77 (12.7%)                                | 606             | 63 (12.0%)                              | 525             | 0.719                 |
| HCC, n (%)                    | 64 (10.6%)                                | 606             | 25 (4.8%)                               | 525             | < 0.001               |
| Prior IFN, n (%)              | 160 (26.4%)                               | 263             | 81 (15.4%)                              | 180             | 0.001                 |
| AST, U/L                      | 61.8 (45.6)                               | 606             | 58.3 (48.2)                             | 525             | 0.204                 |
| ALT, U/L                      | 76.1 (71.7)                               | 606             | 71.1 (66.2)                             | 525             | 0.222                 |
| Albumin, g/dL                 | 4.2 (0.3)                                 | 606             | 4.3 (0.3)                               | 524             | 0.004                 |
| Albumin ≤ 3.5 g/dL, n (%)     | 23 (3.8%)                                 | 606             | 17 (3.2%)                               | 524             | 0.617                 |
| Total bilirubin, mg/dL        | 0.8 (0.4)                                 | 606             | 0.7 (0.3)                               | 525             | < 0.001               |
| Platelet, 10 <sup>3</sup> /μL | 167.3 (65.9)                              | 606             | 180.2 (67.4)                            | 525             | 0.001                 |
| FIB-4 score                   | 3.67 (2.86)                               | 606             | 3.22 (2.89)                             | 525             | 0.009                 |

|                                   |              |     |              |     |         |
|-----------------------------------|--------------|-----|--------------|-----|---------|
| FIB-4 score, n (%)                |              | 606 |              | 525 |         |
| < 1.45                            | 112 (18.3%)  |     | 128 (24.4%)  |     | 0.016   |
| 1.45 - 3.25                       | 237 (39.1%)  |     | 208 (39.6%)  |     | 0.861   |
| > 3.25                            | 257 (42.4%)  |     | 189 (36.0%)  |     | 0.028   |
| AFP, ng/mL                        | 8.7 (27.2)   | 606 | 7.7 (22.1)   | 521 | 0.495   |
| HCV-RNA, 10 <sup>6</sup><br>IU/mL | 12.0 (229.5) | 606 | 2.9 (5.1)    | 525 | 0.368   |
| HCV-RNA, log-<br>transformed      | 5.9 (0.9)    | 606 | 5.8 (1.0)    | 525 | 0.613   |
| HCV genotype, n<br>(%)            |              | 606 |              | 525 |         |
| 1a                                | 9 (1.5%)     |     | 12 (2.3%)    |     | 0.380   |
| 1b                                | 436 (71.9%)  |     | 347 (66.1%)  |     | 0.033   |
| 2                                 | 140 (23.1%)  |     | 160 (30.5%)  |     | 0.005   |
| 3                                 | 1 (0.2%)     |     | 3 (0.6%)     |     | 0.342   |
| 6                                 | 8 (1.3%)     |     | 16 (3.0%)    |     | 0.061   |
| mixed                             | 12 (2.0%)    |     | 15 (2.9%)    |     | 0.335   |
| DAA's, n (%)                      |              | 606 |              | 525 |         |
| DCV/ASV                           | 38 (6.3%)    |     | 11 (2.1%)    |     | 0.001   |
| ProD                              | 119 (19.6%)  |     | 73 (13.9%)   |     | 0.010   |
| Zepatier                          | 217 (35.8%)  |     | 188 (35.8%)  |     | 1.000   |
| Maviret                           | 45 (7.4%)    |     | 96 (18.3%)   |     | < 0.001 |
| SOF-based                         | 187 (30.9%)  |     | 157 (29.9%)  |     | 0.728   |
| Ribavirin use, n<br>(%)           | 87 (14.4%)   | 606 | 56 (10.7%)   | 525 | 0.063   |
| Hemoglobin, g/dL                  | 13.8 (1.7)   | 606 | 13.8 (1.7)   | 525 | 0.874   |
| Fasting plasma<br>glucose, mg/dL  | 115.8 (39.3) | 335 | 114.6 (40.8) | 243 | 0.720   |
| Creatinine, mg/dL                 | 0.91 (0.33)  | 606 | 0.90 (0.40)  | 525 | 0.670   |

|                                          |               |     |               |     |       |
|------------------------------------------|---------------|-----|---------------|-----|-------|
| eGFR,<br>mL/min/1.73m <sup>2</sup>       | 84.11 (24.38) | 606 | 85.92 (24.19) | 525 | 0.211 |
| eGFR category, n<br>(%)                  |               | 606 |               | 525 |       |
| G1: ≥ 90<br>mL/min/1.73m <sup>2</sup>    | 221 (36.5%)   |     | 218 (41.5%)   |     | 0.082 |
| G2: 60 - 89<br>mL/min/1.73m <sup>2</sup> | 297 (49.0%)   |     | 234 (44.6%)   |     | 0.136 |
| G3: 30 - 59<br>mL/min/1.73m <sup>2</sup> | 84 (13.9%)    |     | 65 (12.4%)    |     | 0.463 |
| G4: 15 - 29<br>mL/min/1.73m <sup>2</sup> | 3 (0.5%)      |     | 6 (1.1%)      |     | 0.317 |
| G5: < 15<br>mL/min/1.73m <sup>2</sup>    | 1 (0.2%)      |     | 2 (0.4%)      |     | 0.600 |

Data are expressed as the mean (standard deviation) or number (percentage).

Abbreviations: AFP, alpha-fetoprotein; ALT, alanine aminotransferase; AST, aspartate transaminase; BMI, body mass index; DAA, direct-acting antiviral; DCV/ASV, daclatasvir/asunaprevir; eGFR, estimated glomerular filtration rate; FIB-4, fibrosis index based on four factors; HCC, hepatocellular carcinoma; IFN, interferon; ProD, paritaprevir/ritonavir/ombitasvir/dasabuvir; SOF, sofosbuvir.
